# Supplementary material for: The global, regional, and national burden of appendicitis in 204 countries and territories, 1990–2019: a systematic analysis from the Global Burden of Disease Study 2019
Source: Springer Nature journal article supplement (doi:10.1186/s12876-023-02678-7), 2023-02-22
Supplement: MOESM2 [file 24054940]

## Additional file 2

### The figures of appendicitis burden in 204 countries and territories, 1990–2019: a systematic analysis from the Global Burden of Disease Study 2019

|                                                                                                                                                             |    |
|-------------------------------------------------------------------------------------------------------------------------------------------------------------|----|
| Figure S3: The age-standardized YLDs rate of appendicitis in 2019 for 21 GBD regions, by sex.....                                                           | 2  |
| Figure S4: The percentage change in age-standardized point prevalence of appendicitis from 1990 to 2019 for 21 Global Burden of Disease regions by sex..... | 3  |
| Figure S5: The percentage change in age-standardized point incidence of appendicitis from 1990 to 2019 for 21 Global Burden of Disease regions by sex.....  | 4  |
| Figure S6: The percentage change in age-standardized point YLDs of appendicitis from 1990 to 2019 for 21 Global Burden of Disease regions by sex.....       | 5  |
| Figure S7: Number of prevalent cases of appendicitis from 1990 to 2019 for 21 Global Burden of Disease regions.....                                         | 6  |
| Figure S8: Number of incident cases of appendicitis from 1990 to 2019 for 21 Global Burden of Disease regions.....                                          | 7  |
| Figure S9: Age-standardized YLDs rates of appendicitis per 100 000 population in 2019, by country and territory.....                                        | 8  |
| Figure S10: The percentage change in age-standardized point prevalence of appendicitis from 1990 to 2019 for country and territories.....                   | 9  |
| Figure S11: The percentage change in age-standardized point incidence of appendicitis from 1990 to 2019 for country and territory.....                      | 10 |
| Figure S12: The percentage change in age-standardized point YLDs of appendicitis from 1990 to 2019 for country and territory.....                           | 11 |
| Figure S13: Global cases and age-standardized rates of incidence of appendicitis per 100 000 population by age and sex, 2019.....                           | 12 |
| Figure S14: Global cases and age-standardized rates of YLDs of appendicitis per 100 000 population by age and sex, 2019.....                                | 13 |

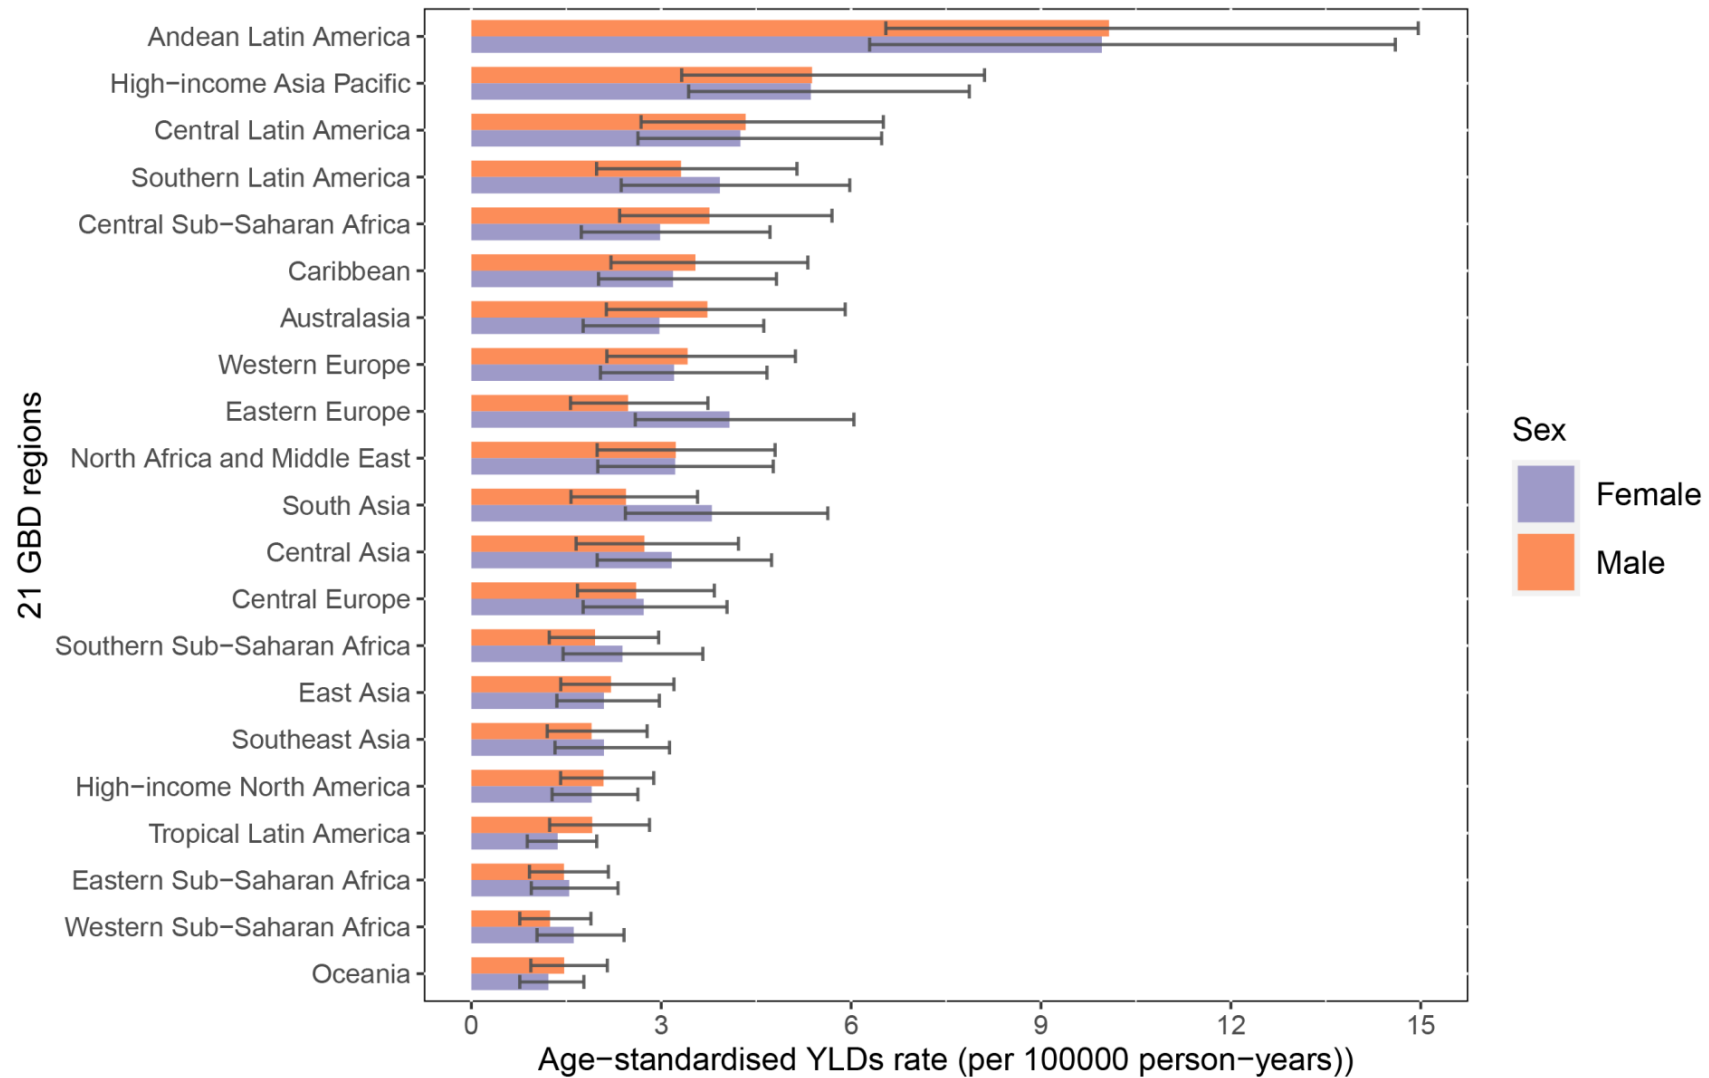

**Figure S3:** The age-standardized YLDs rate of appendicitis in 2019 for 21 GBD regions, by sex.

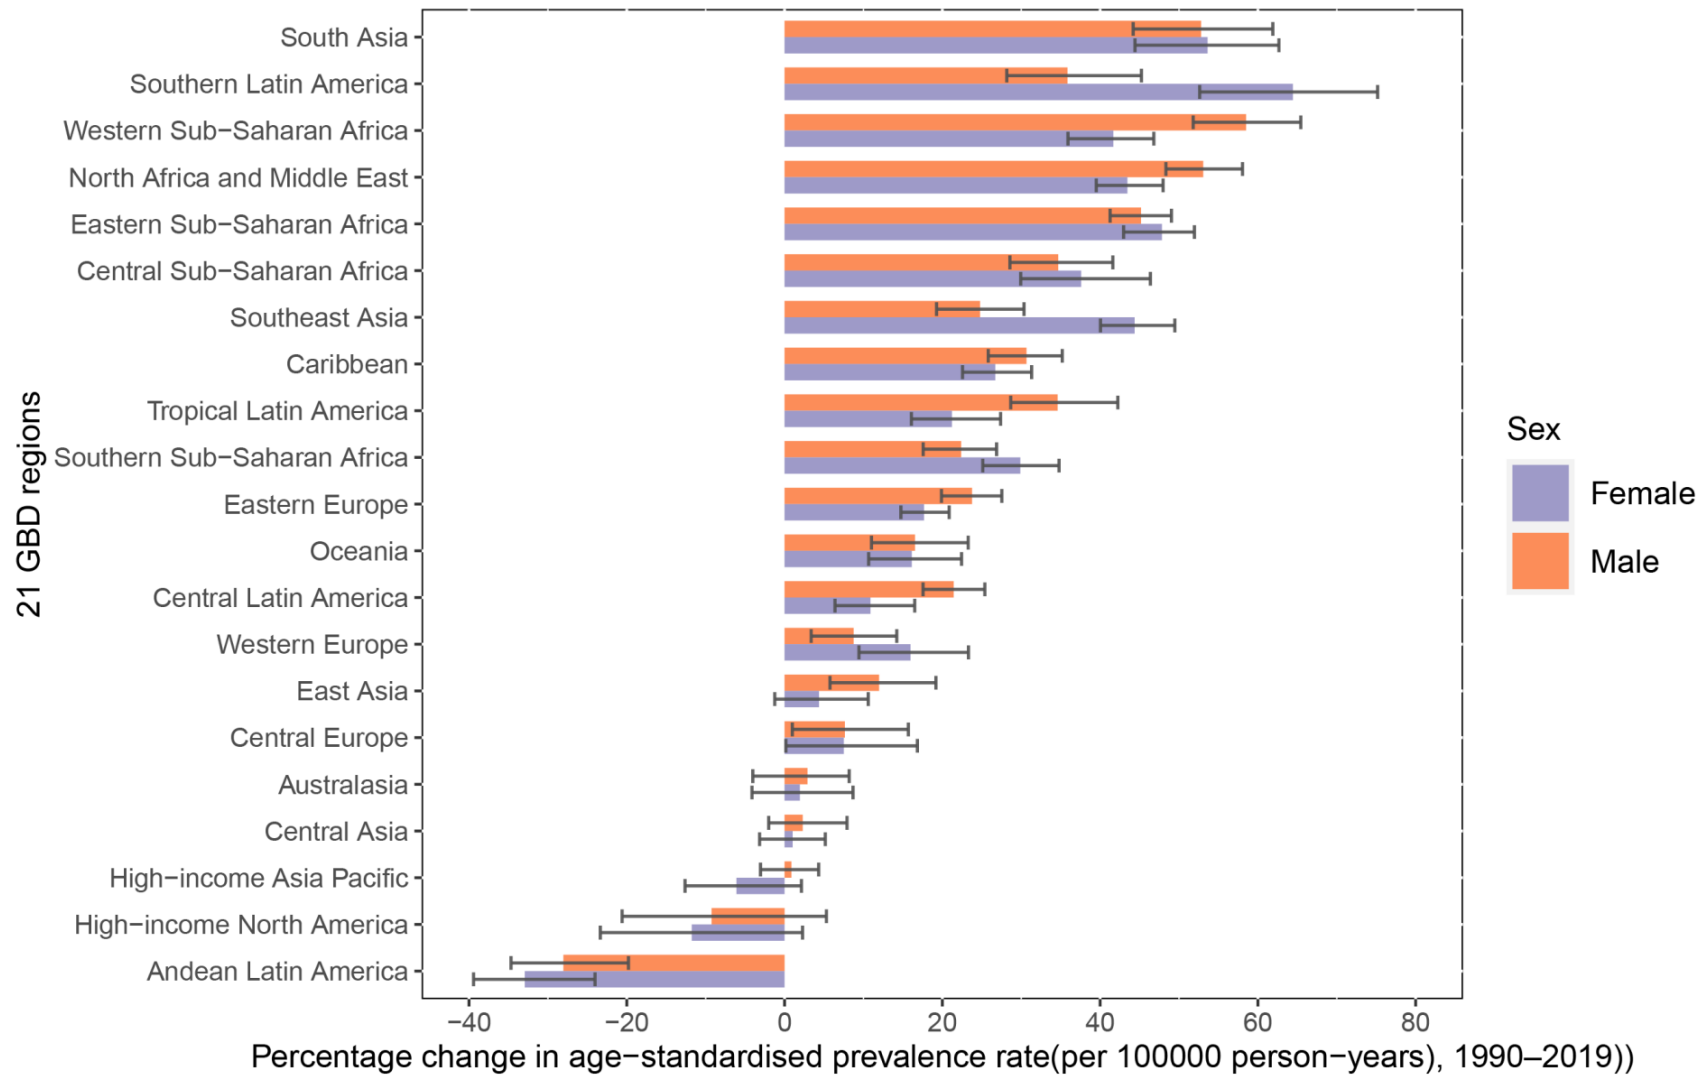

**Figure S4:** The percentage change in age-standardized point prevalence of appendicitis from 1990 to 2019 for 21 Global Burden of Disease regions by sex.

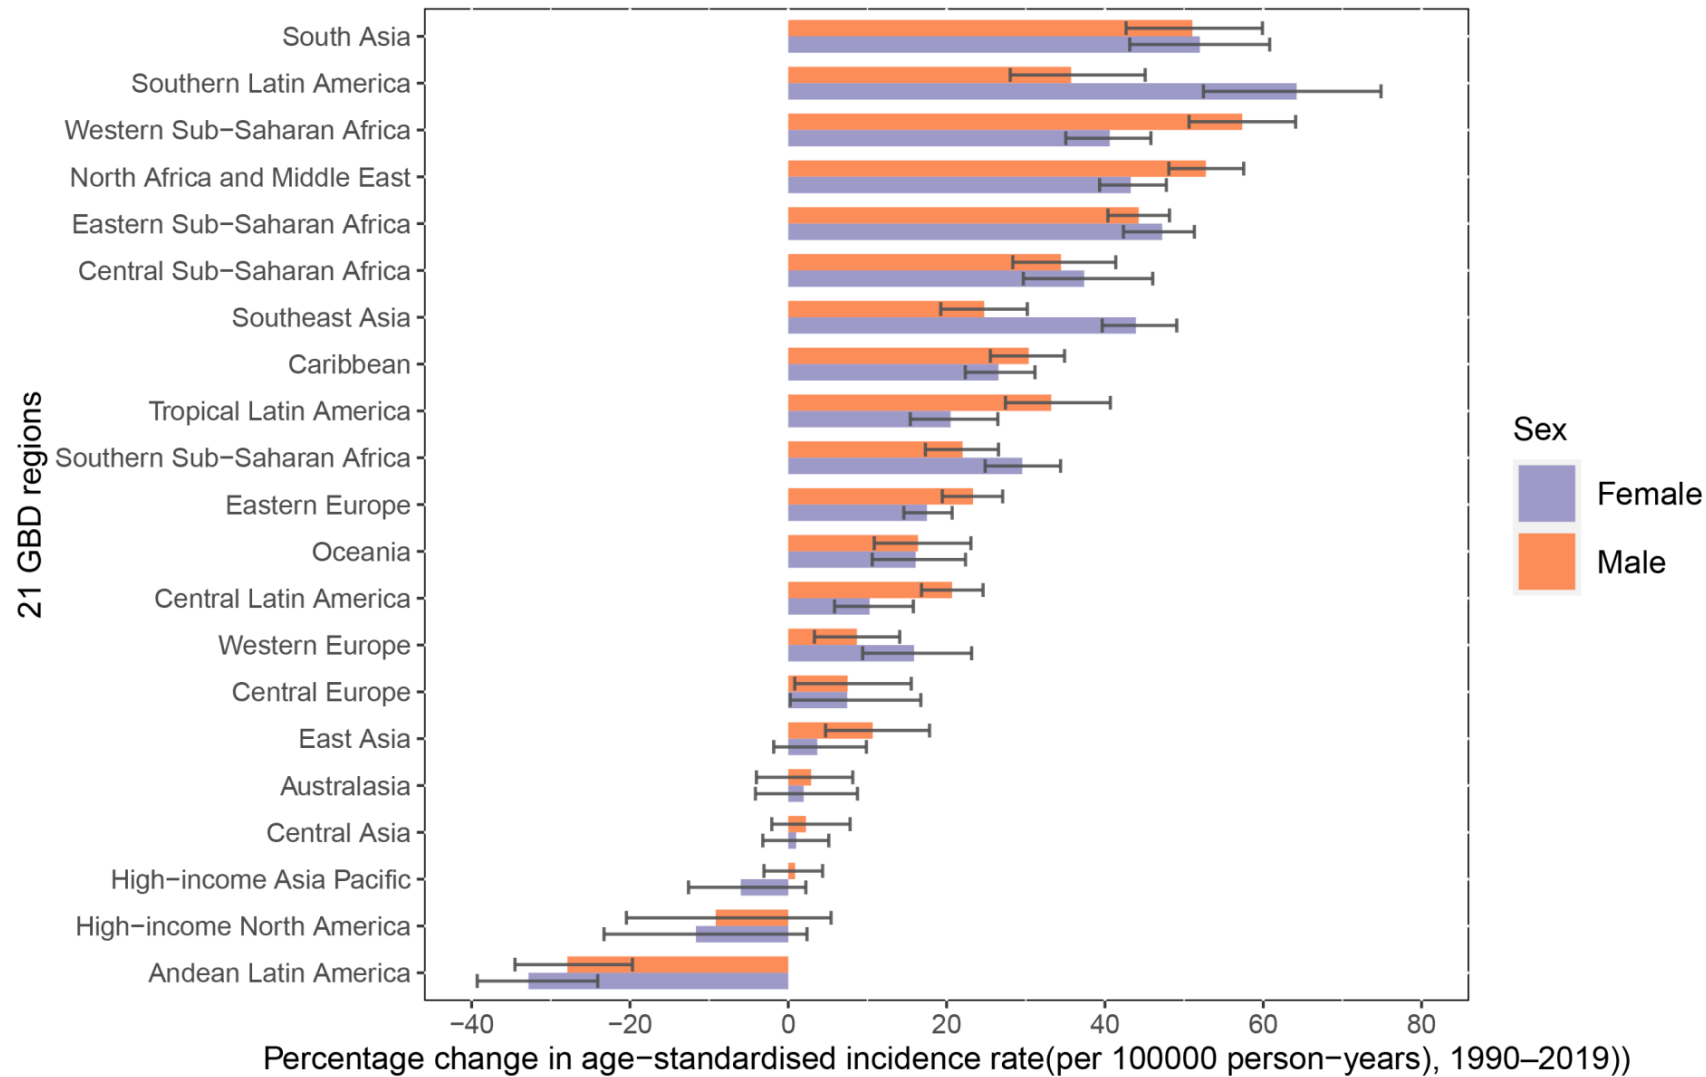

**Figure S5:** The percentage change in age-standardized point incidence of appendicitis from 1990 to 2019 for 21 Global Burden of Disease regions by sex.

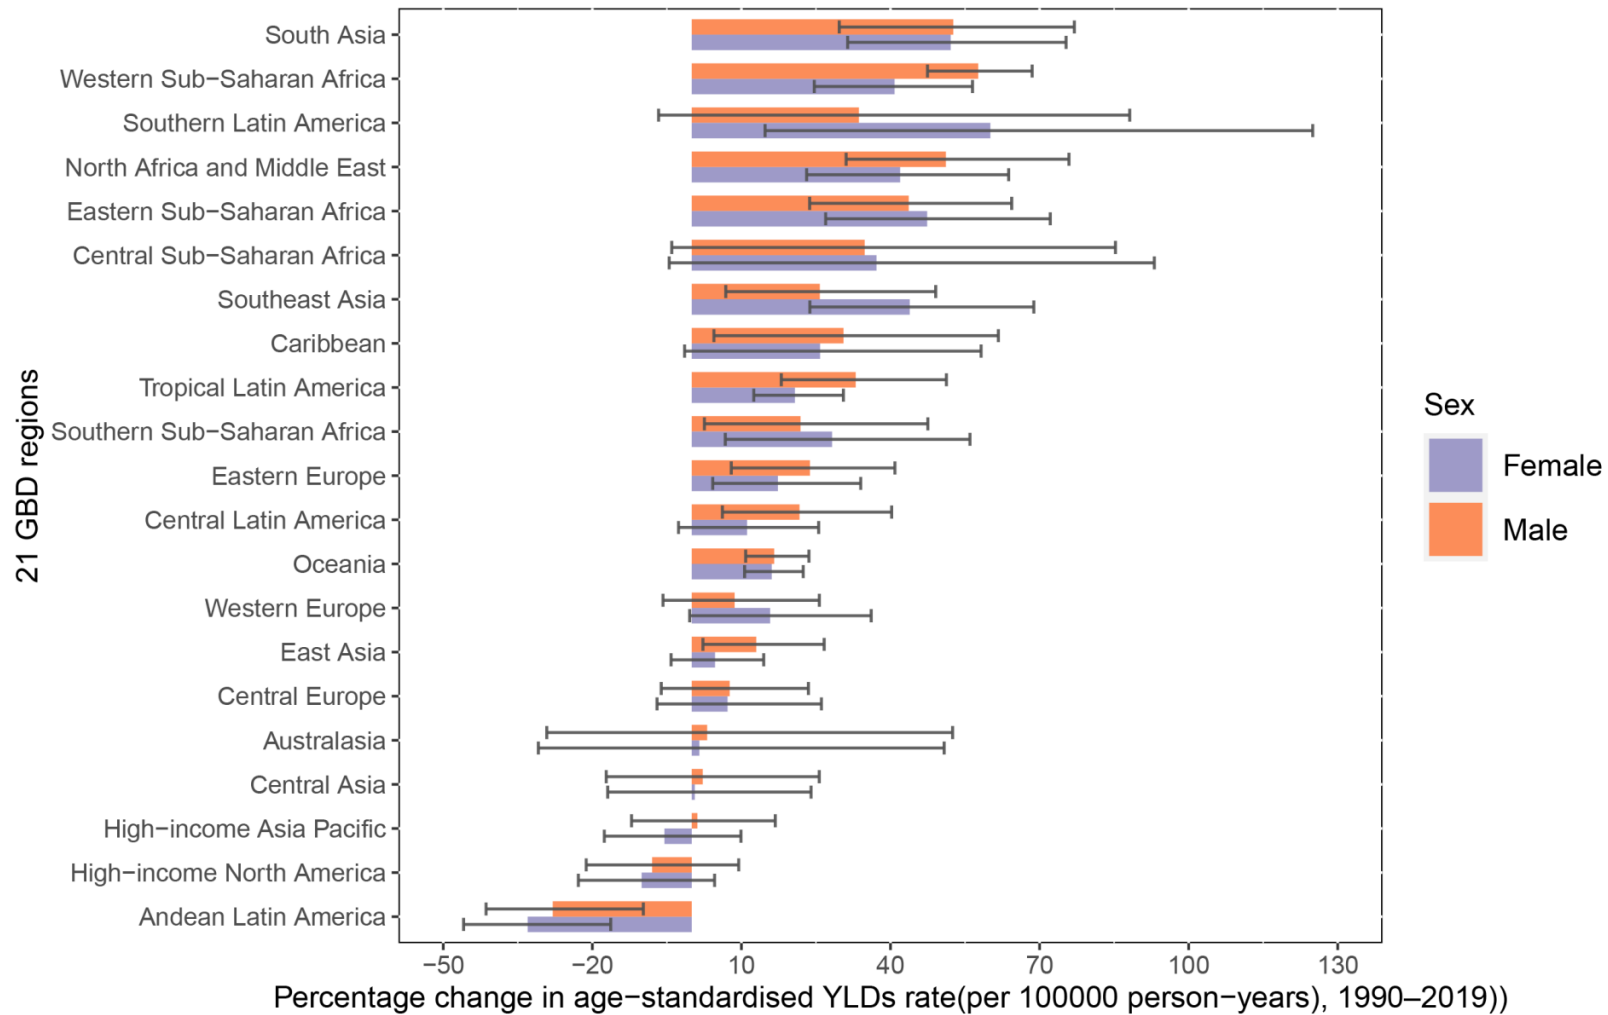

**Figure S6:** The percentage change in age-standardized point YLDs of appendicitis from 1990 to 2019 for 21 Global Burden of Disease regions by sex.

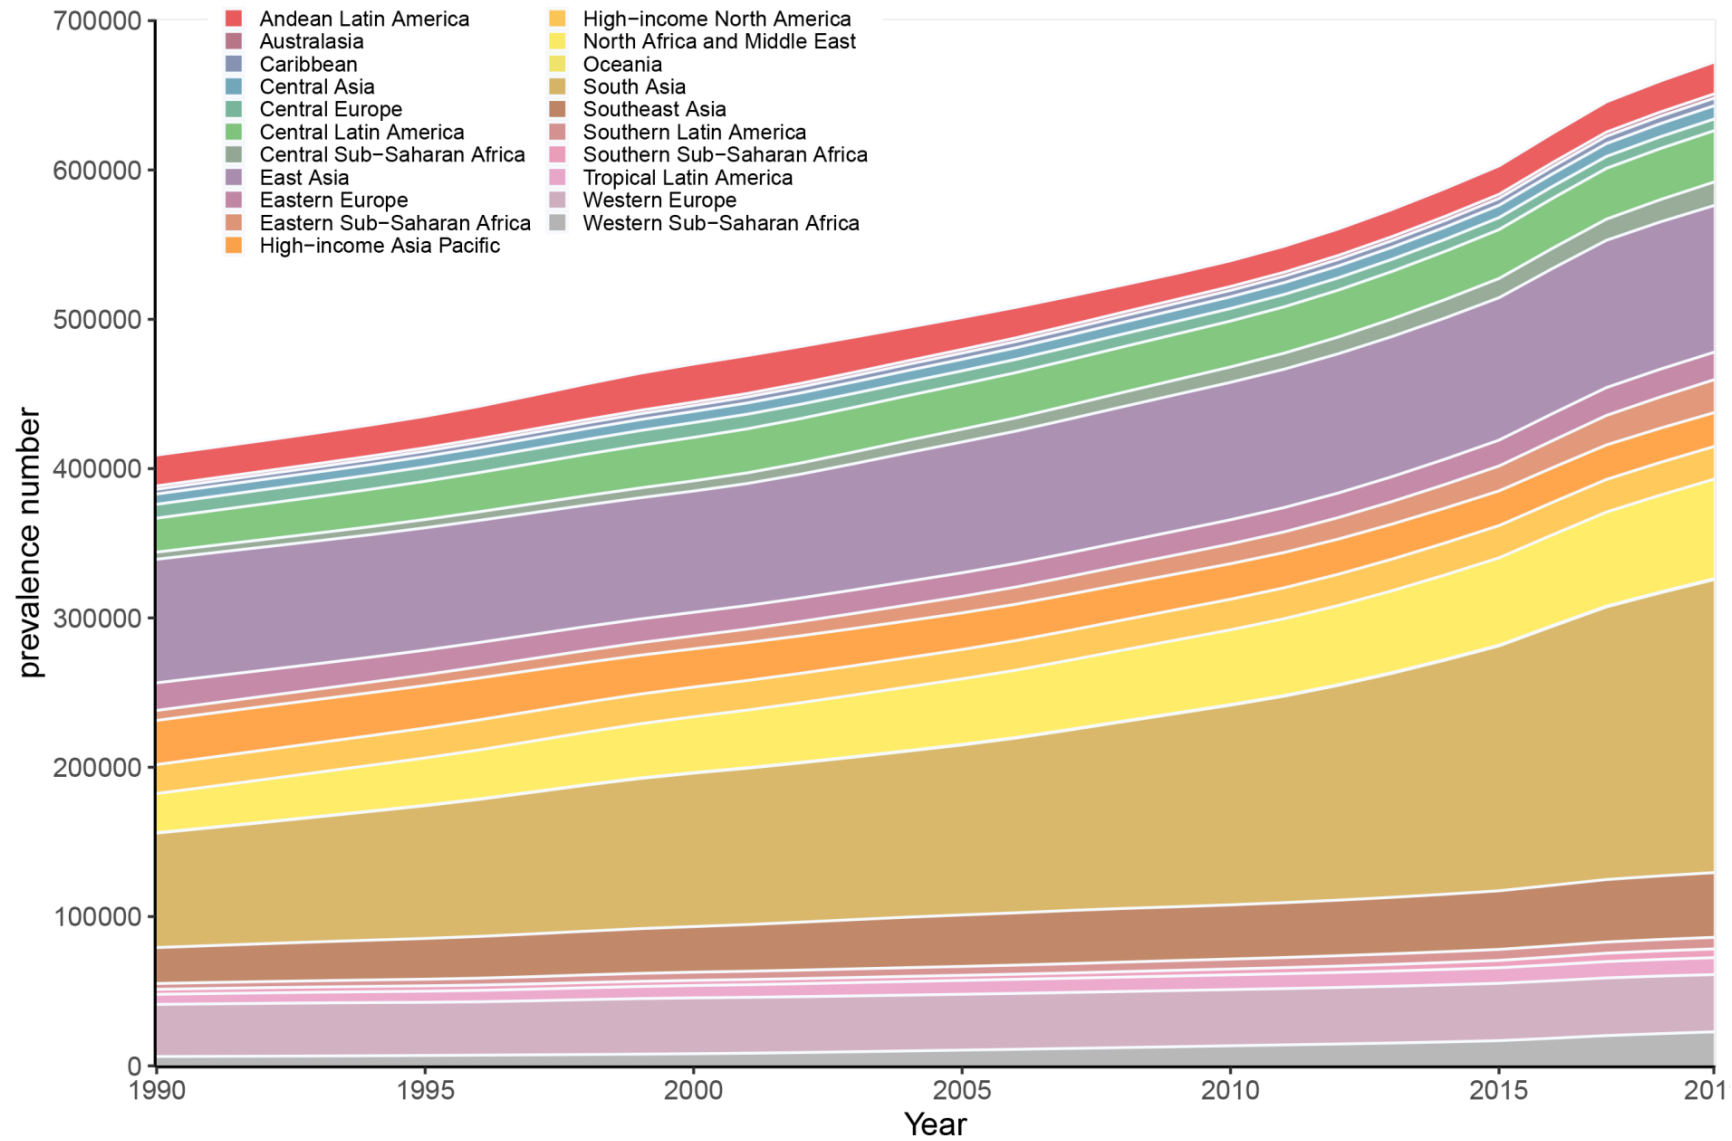

**Figure S7:** Number of prevalent cases of appendicitis from 1990 to 2019 for 21 Global Burden of Disease regions

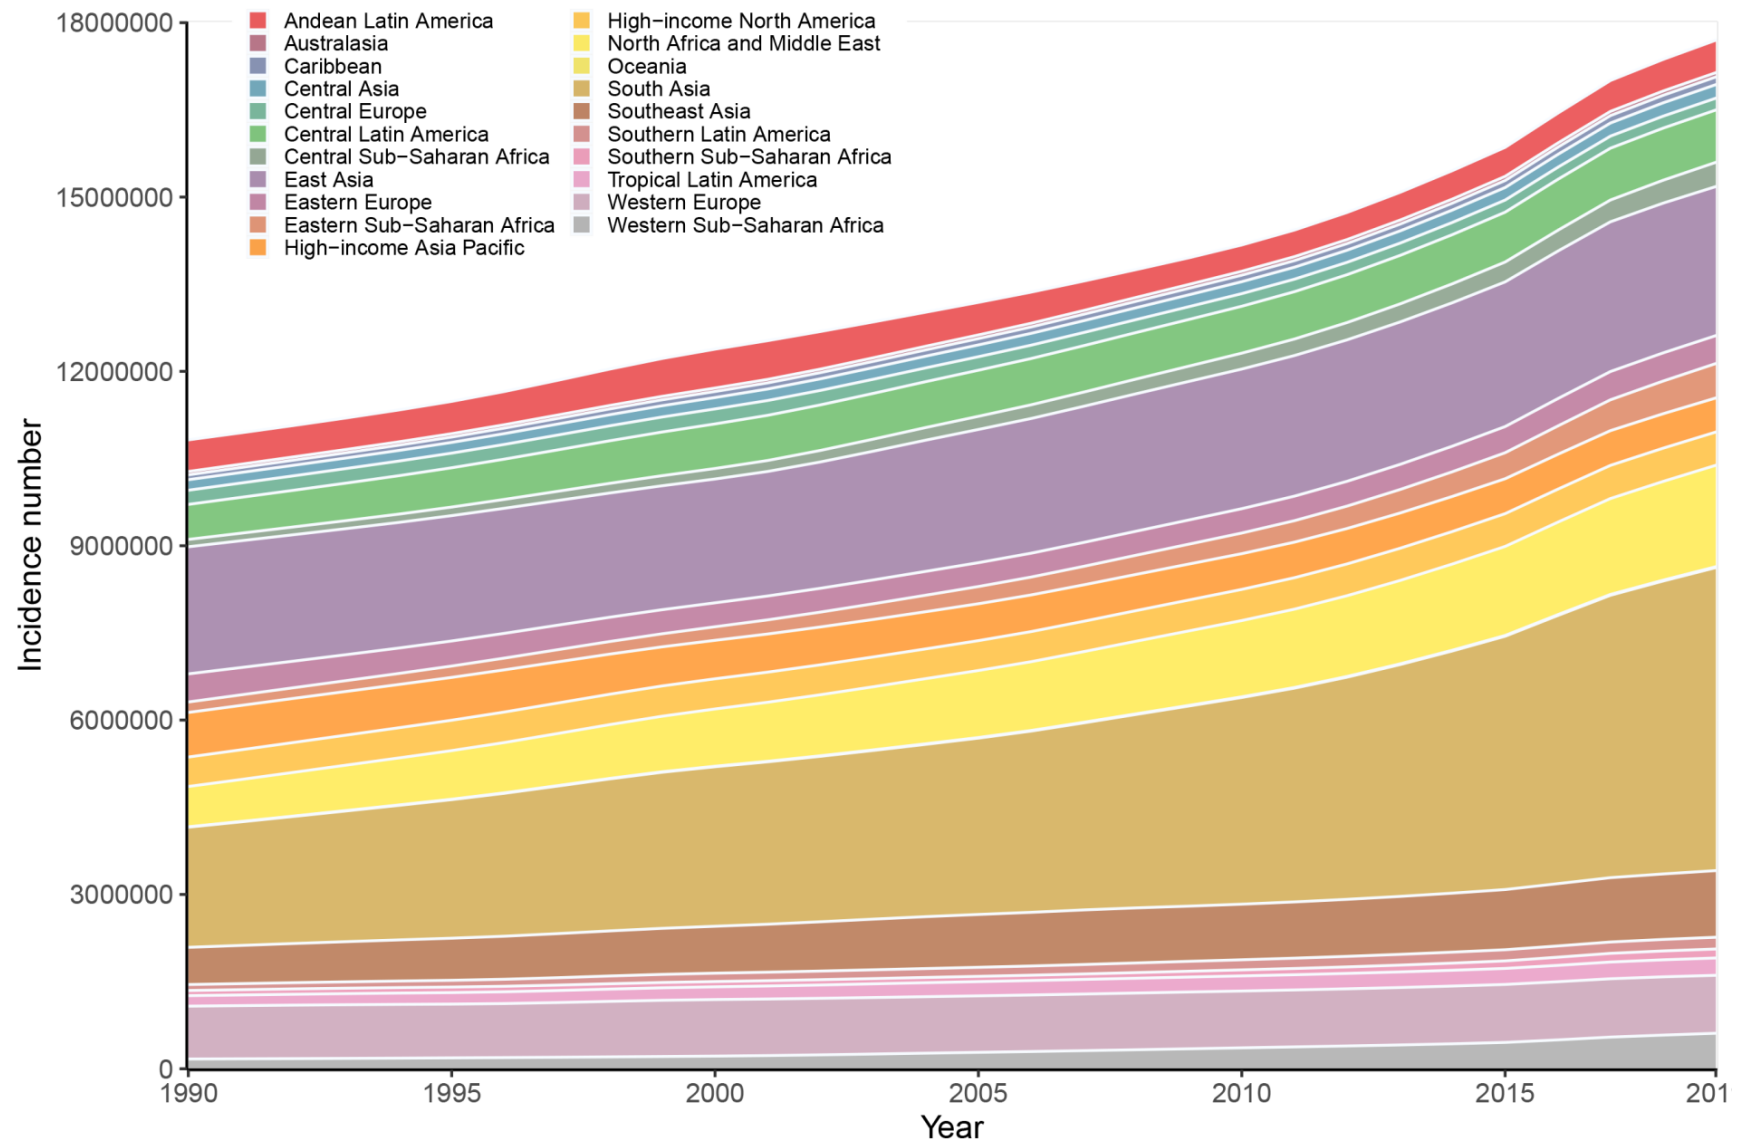

**Figure S8:** Number of incidence cases of appendicitis from 1990 to 2019 for 21 Global Burden of Disease regions

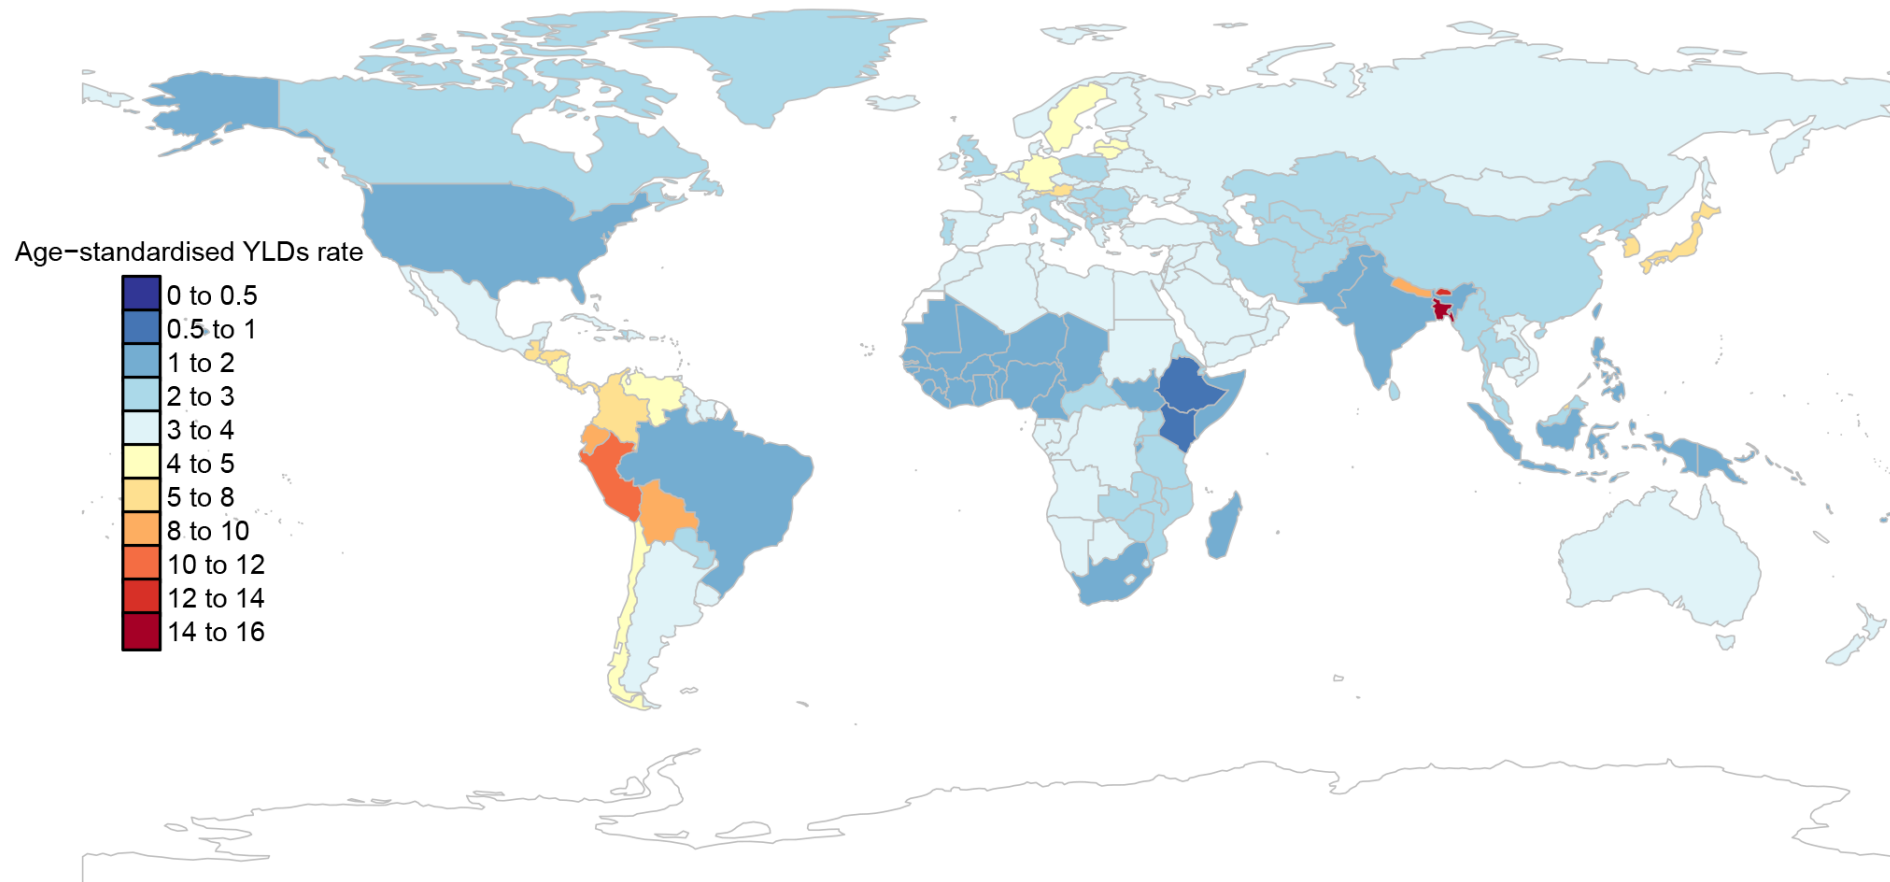

**Figure S9:** Age-standardized YLDs rates of appendicitis per 100 000 population in 2019, by country and territory.



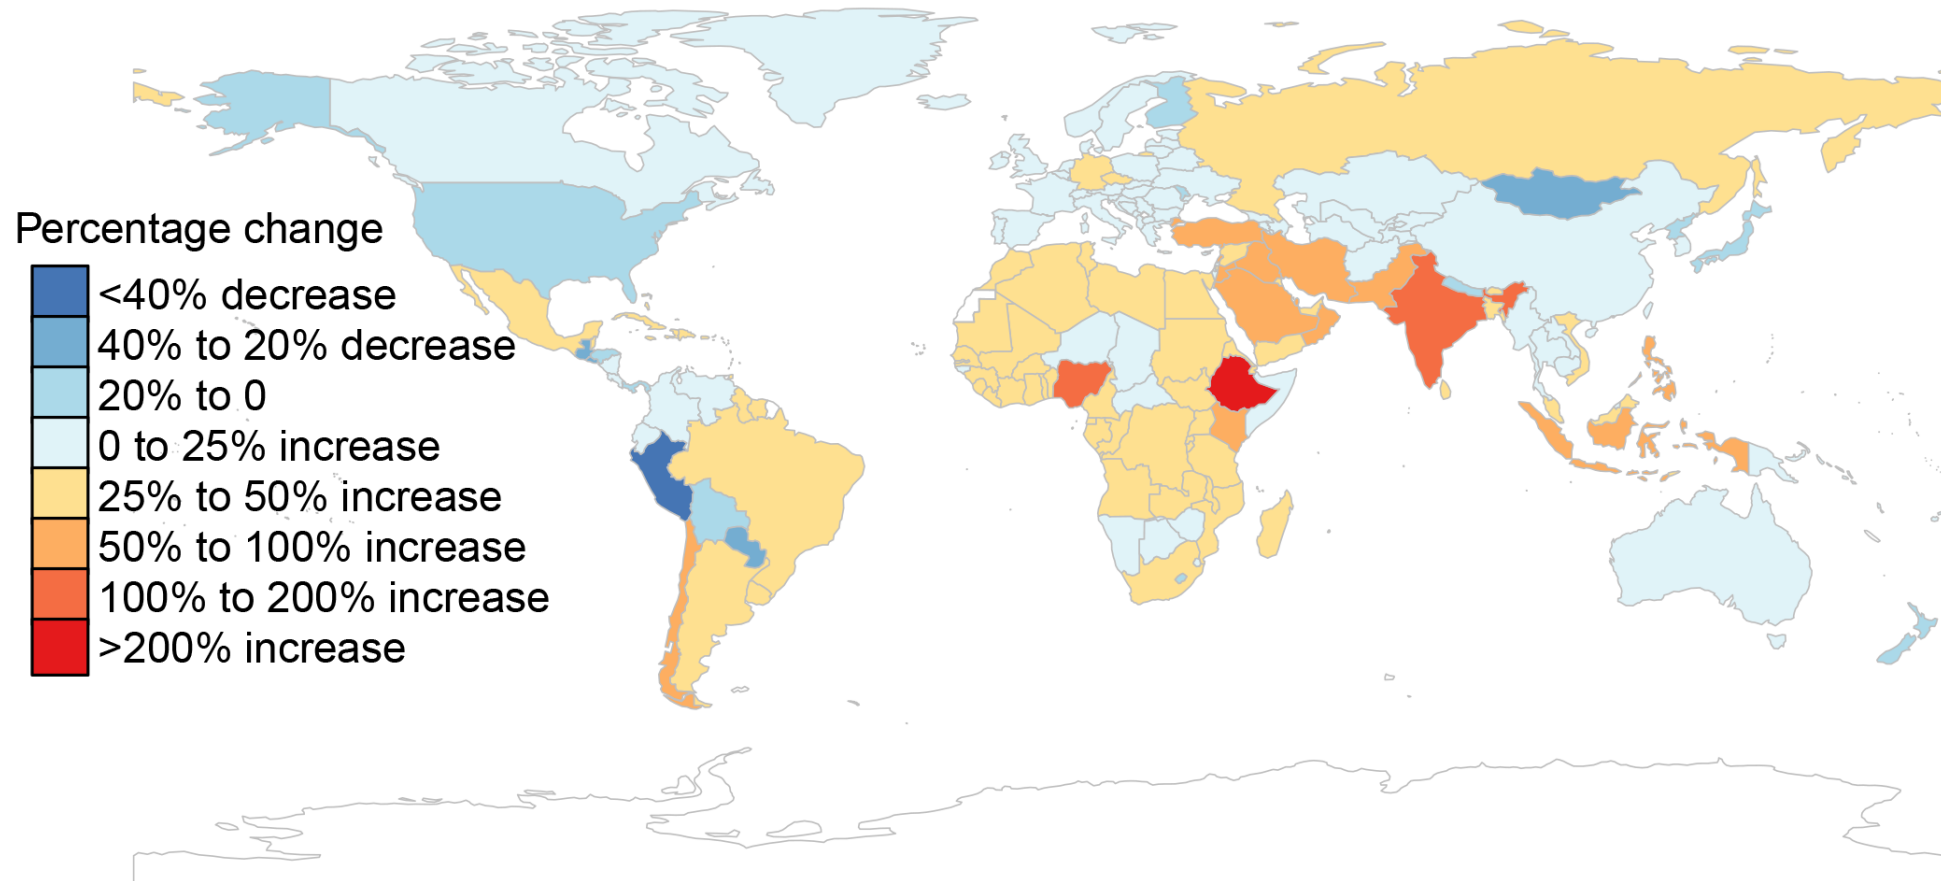

**Figure S10:** The percentage change in age-standardized point prevalence of appendicitis from 1990 to 2019 for country and territory.

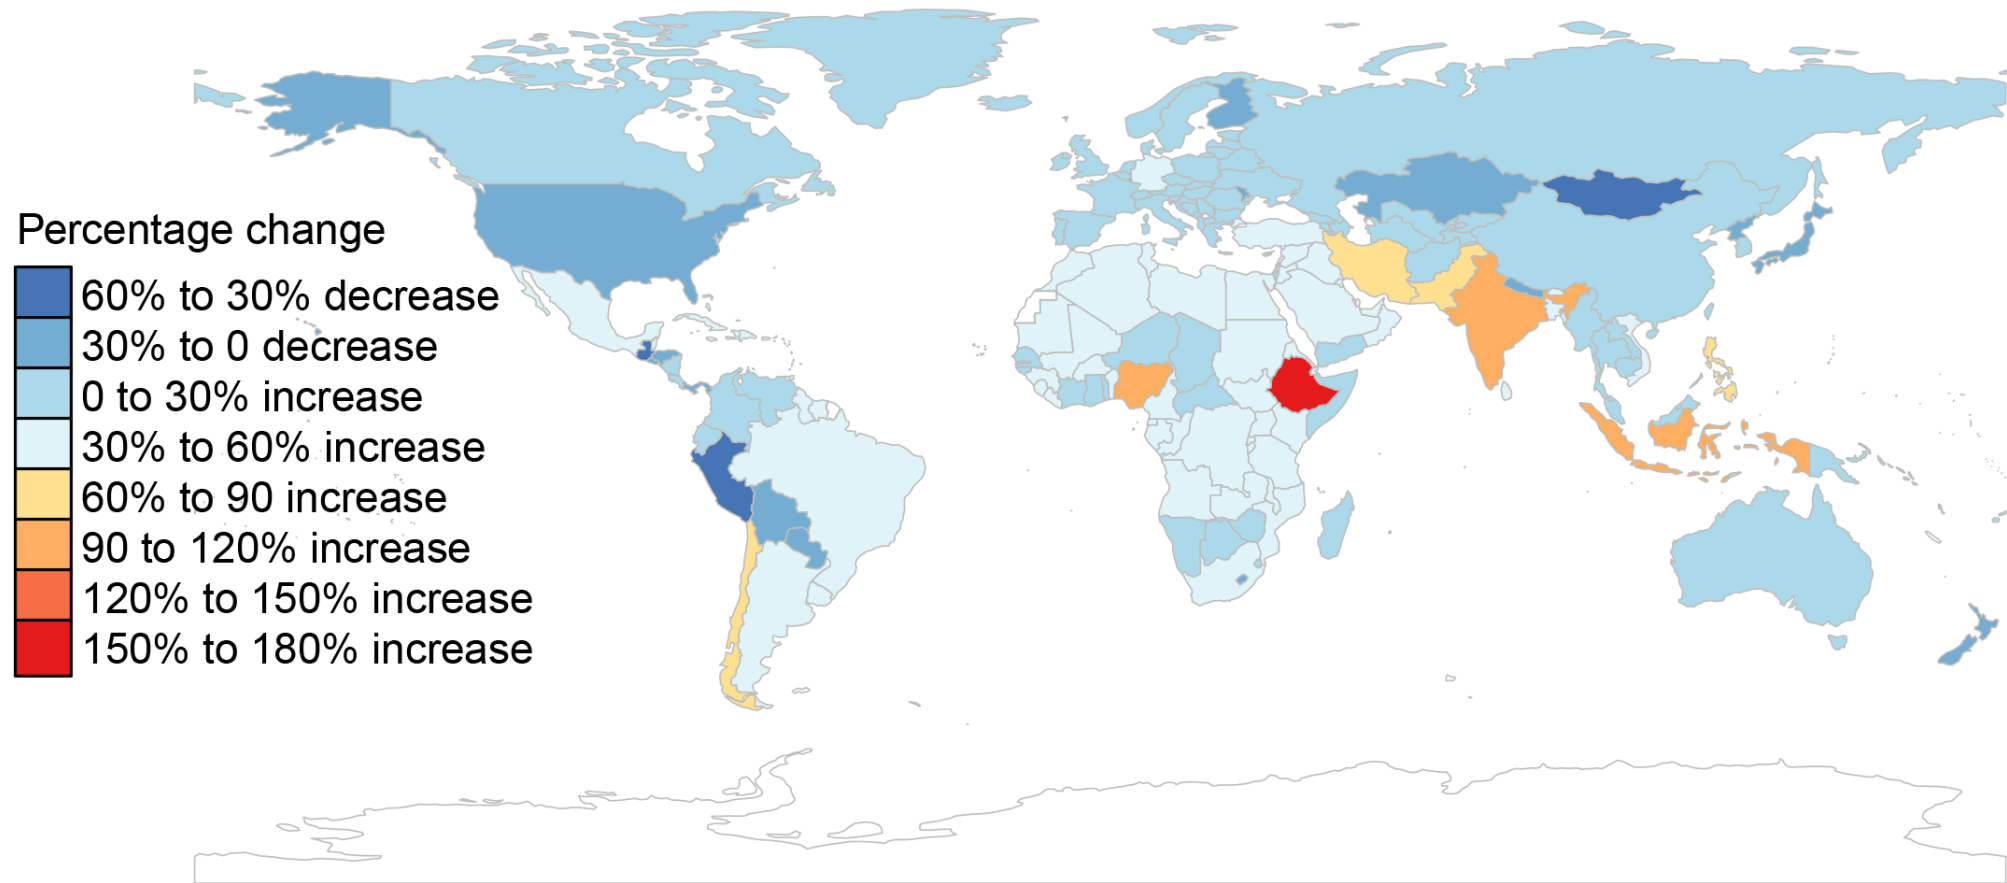

**Figure S11:** The percentage change in age-standardized point incidence of appendicitis from 1990 to 2019 for country and territory.

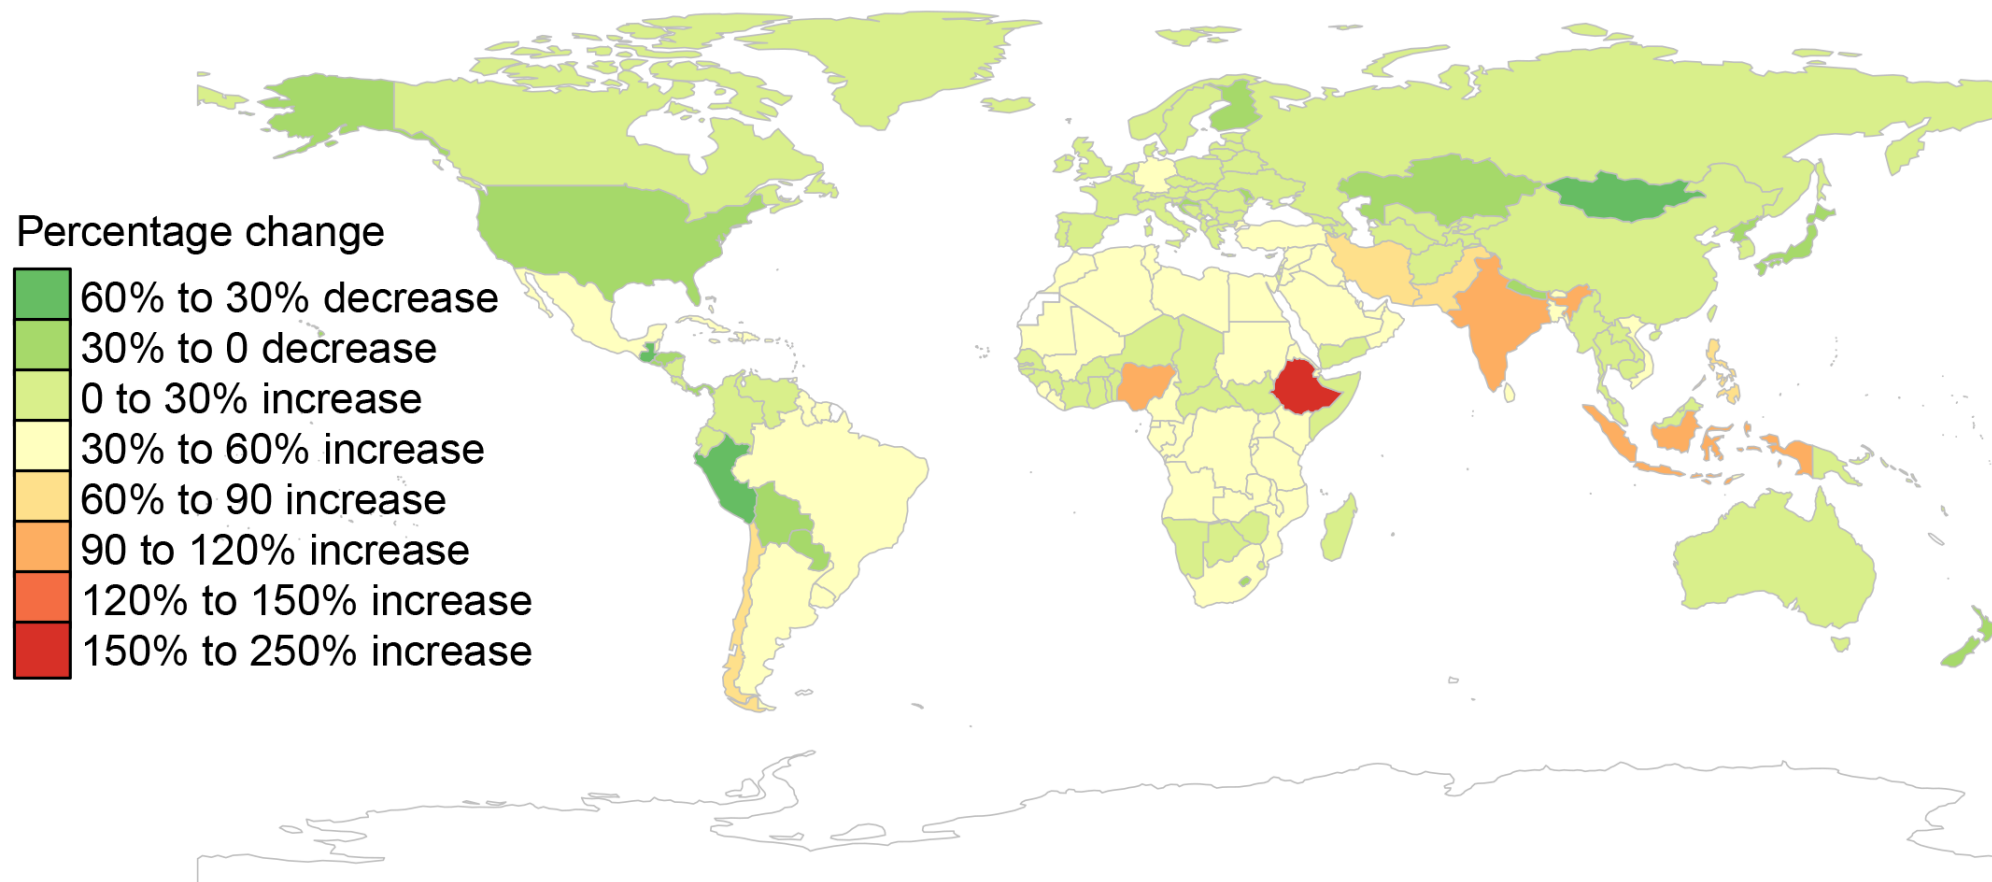

**Figure S12:** The percentage change in age-standardized point YLDs of appendicitis from 1990 to 2019 for country and territory.

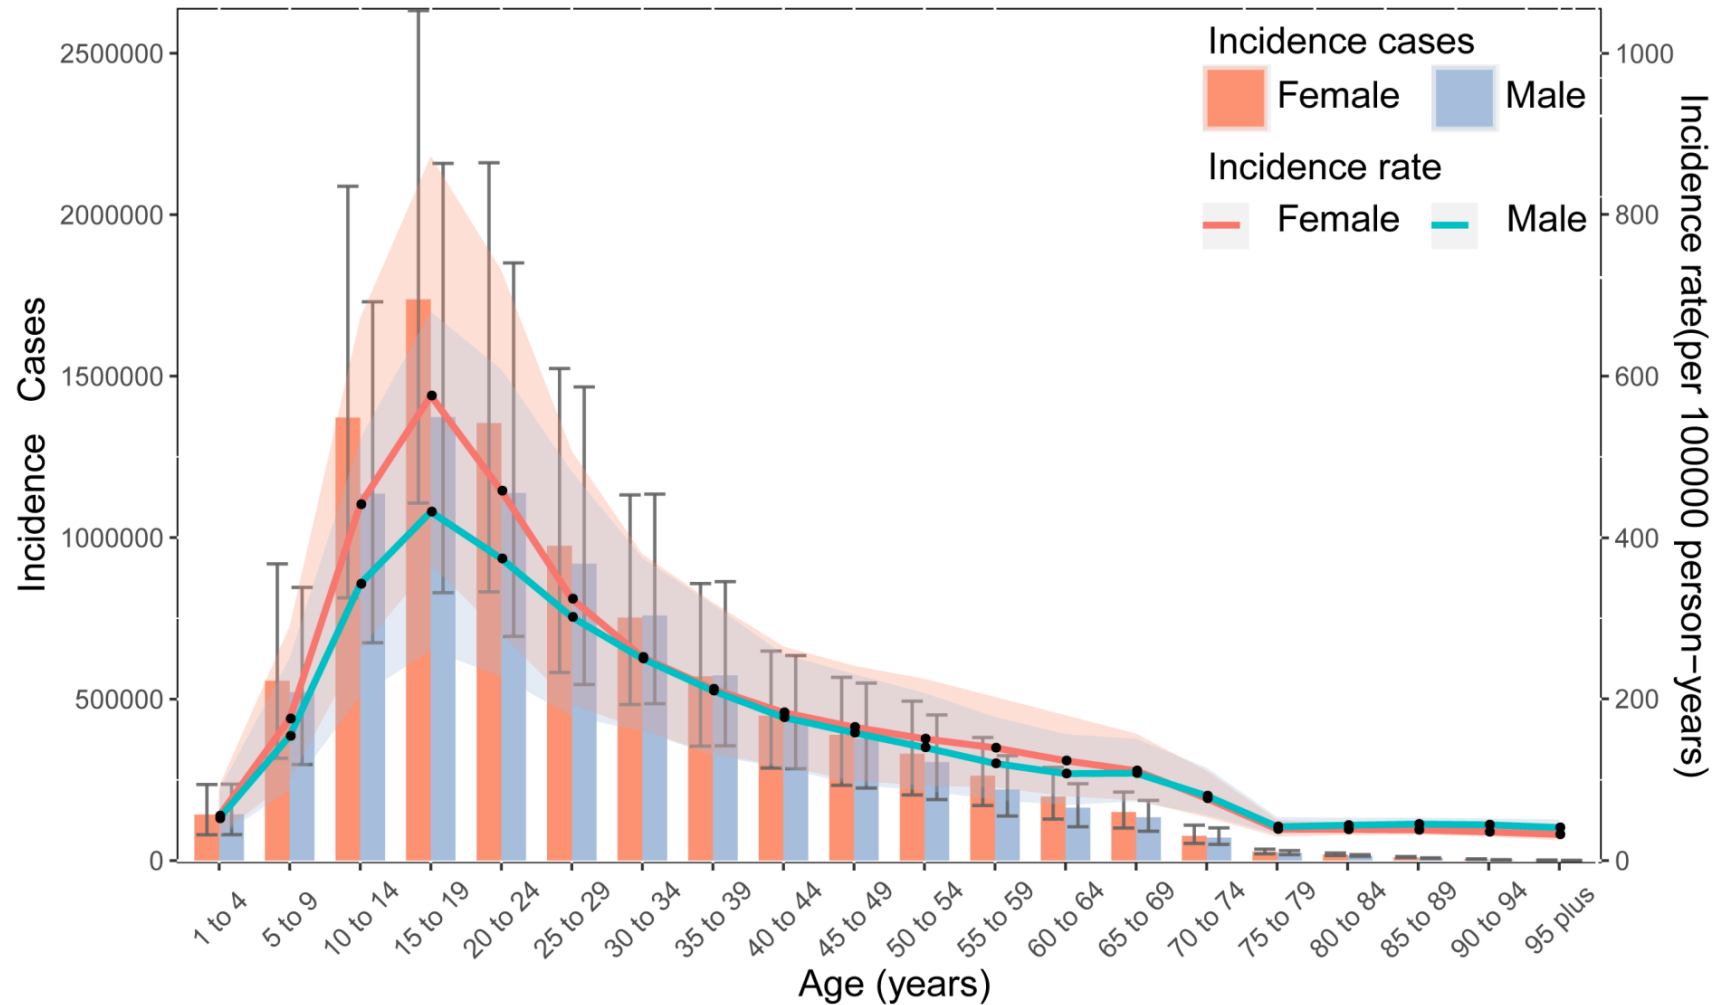

**Figure S13:** Global cases and age-standardized rates of incidence of appendicitis per 100 000 population by age and sex, 2019. Shading indicates the upper and lower limits of the 95% uncertainty intervals (95% UIs).

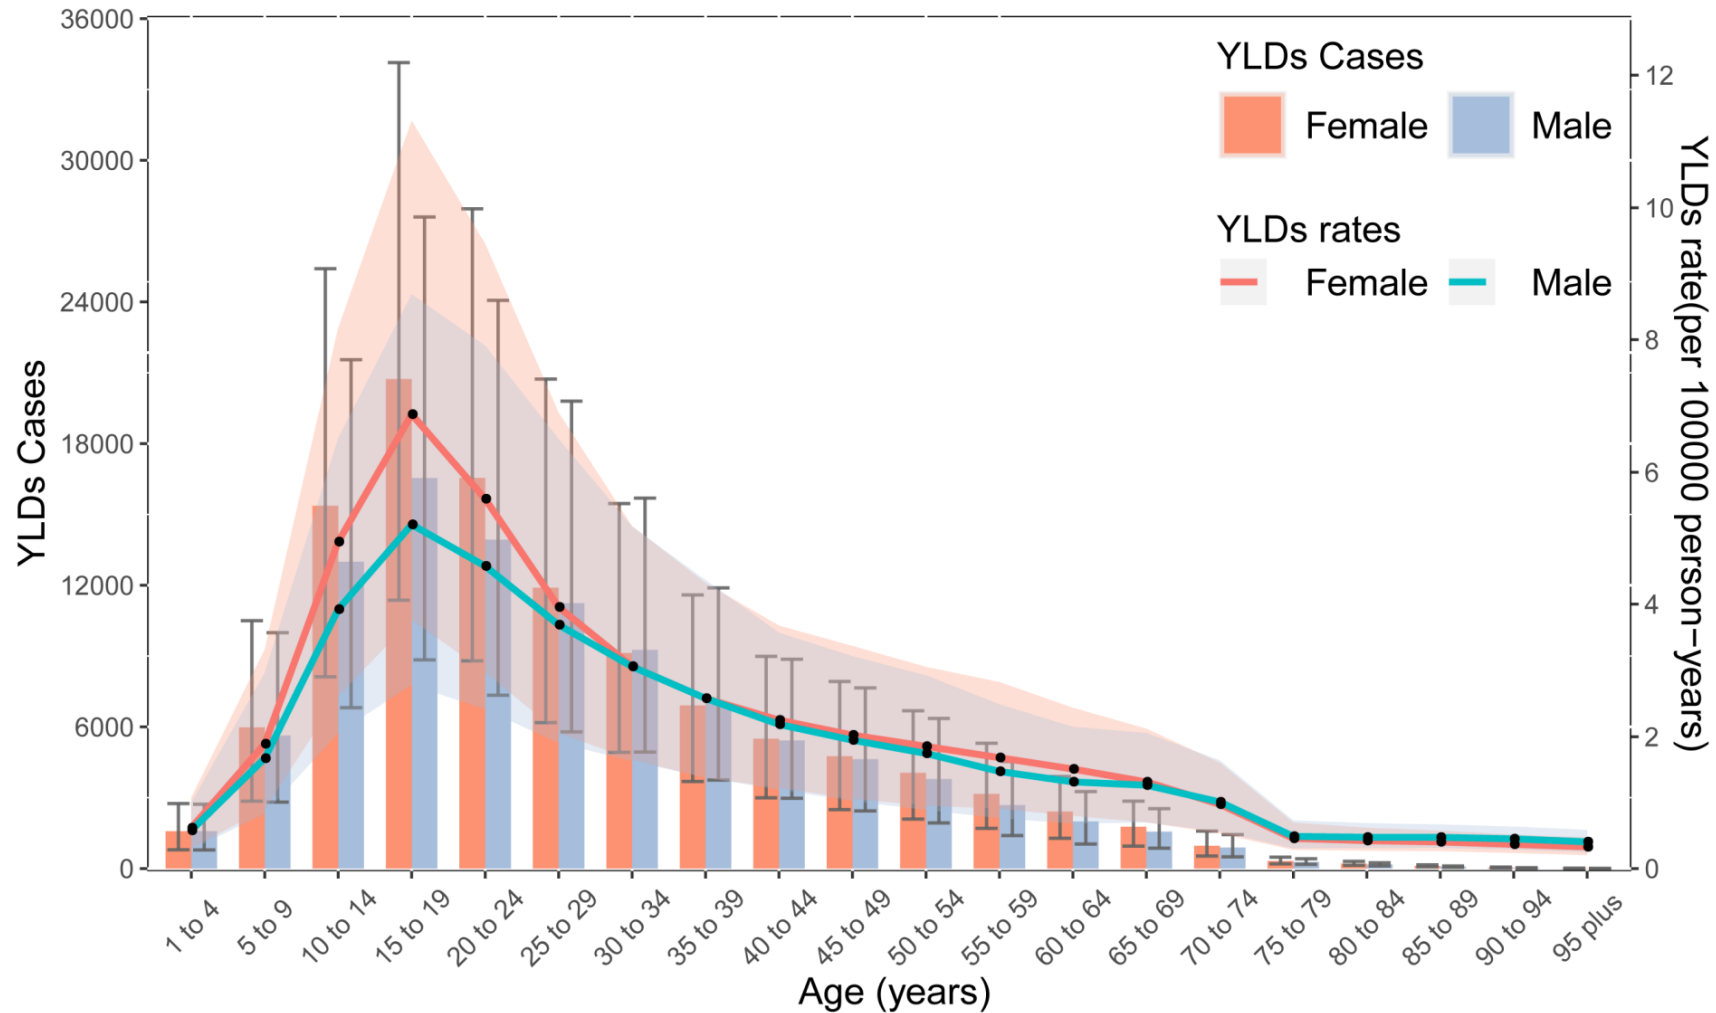

**Figure S14:** Global cases and age-standardized rates of YLDs of appendicitis per 100 000 population by age and sex, 2019. Shading indicates the upper and lower limits of the 95% uncertainty intervals (95% UIs).
